# Supplementary material
Source: publisher figshare collection journal article supplement (https://acs.figshare.com/ndownloader/files/34307729)
Supplement: Supplementary file 1 [file 34307729]

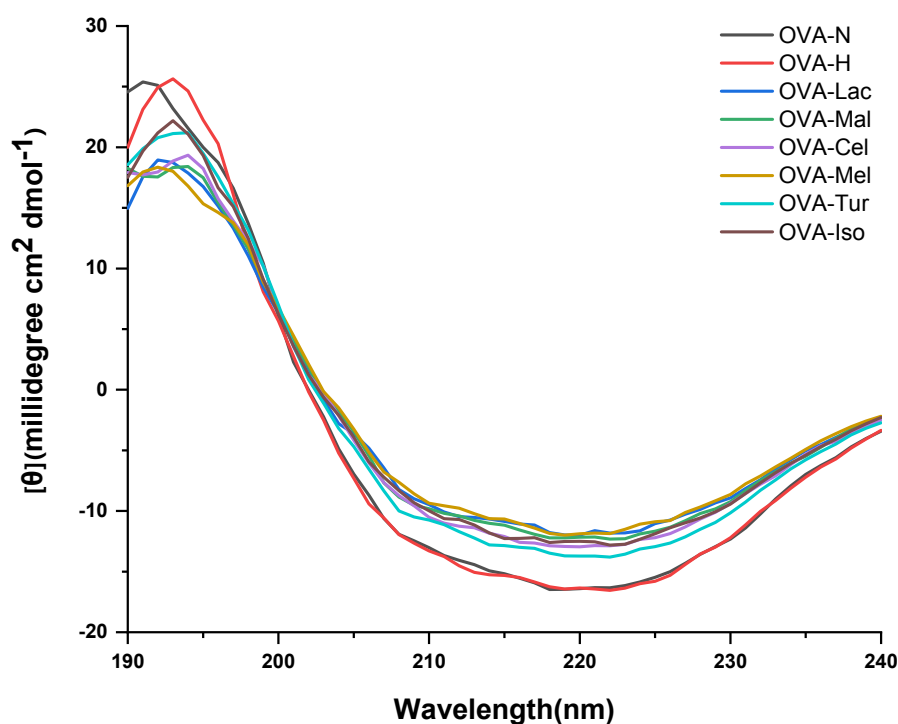

**Figure S1** Far UV-CD spectra of glycated OVA modified by different disaccharides

**Table S1** Possible allergenic epitopes in each sample

|                                                      |                                                                                              |
|------------------------------------------------------|----------------------------------------------------------------------------------------------|
| potential glycation sites in the allergenic epitopes | K16, K19, K46, R50, K55, R58, K61, R84, R104, R126, R142, K189, R199, R276, K277, K279, R381 |
| OVA-Mel                                              | K46, R50, K61, R84, K92, R126, K186, K189, K206, K226, K228, K263, R276, K277, K323, R359    |
| OVA-Cel                                              | K46, R50, K61, K92, K122, R126, R199, K226, K228, K263, K279, K322, R339, R359               |
| OVA-Mal                                              | K46, K61, K92, K122, R126, K206, R276, K277, K322, R339, K369                                |
| OVA-Lac                                              | K46, K61, K92, R110, K122, R126, K226, K228, R276, K277, R359                                |
| OVA-Tur                                              | K19, R84, K92, K181, K186, K206, K228, K263, R359                                            |
| OVA-Iso                                              | K19, K61, R84, K92, K181, K206, R359                                                         |

Glycation site in red was the potential allergenic epitopes in each sample.

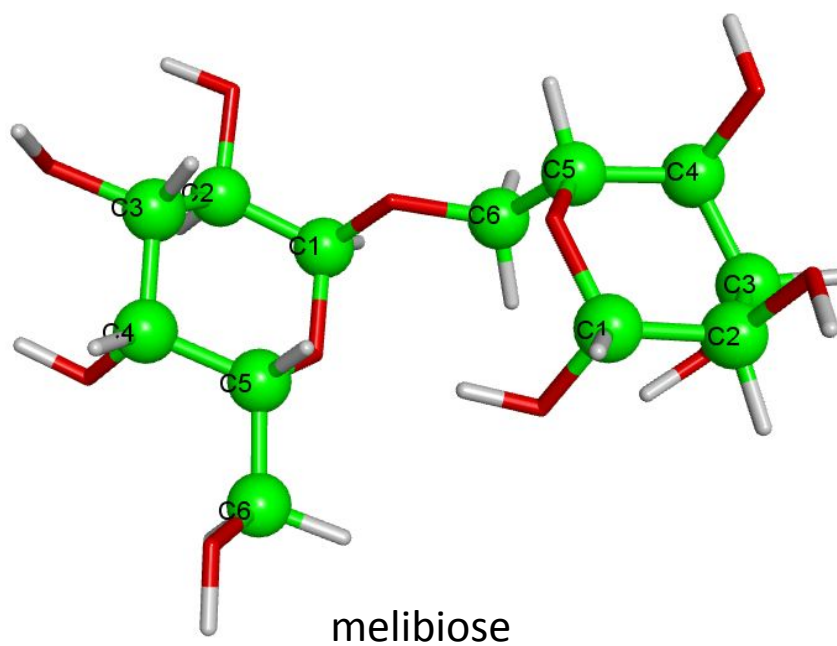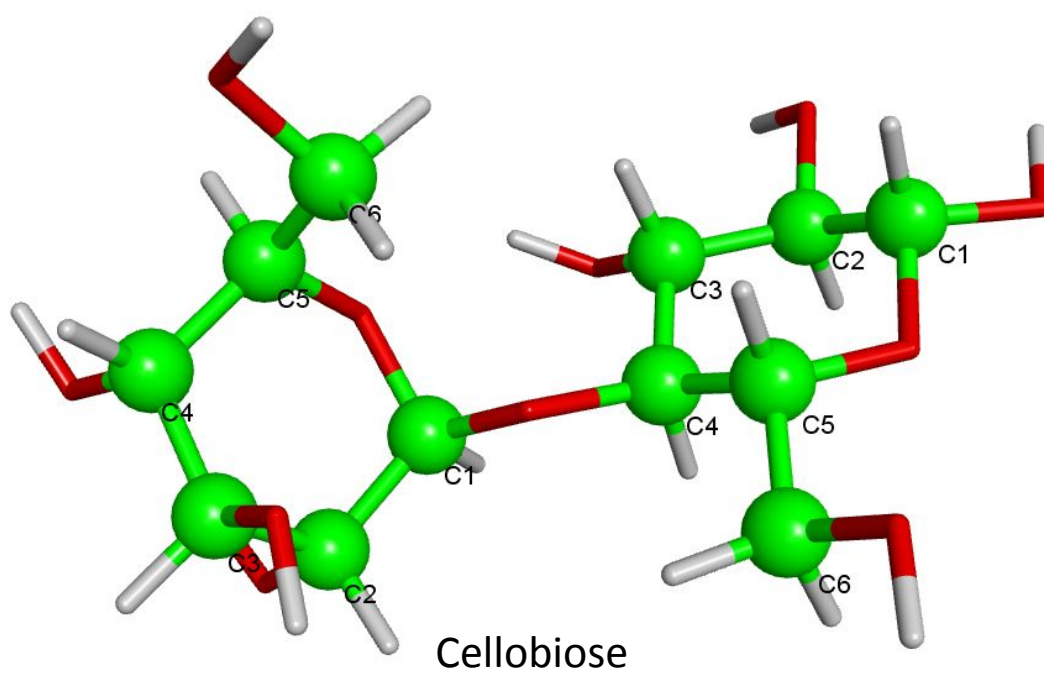

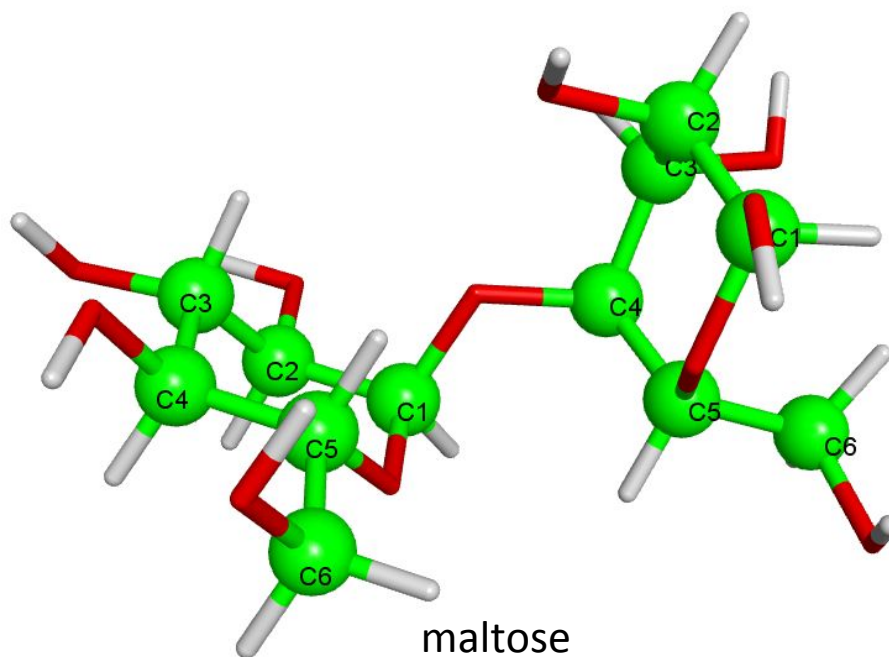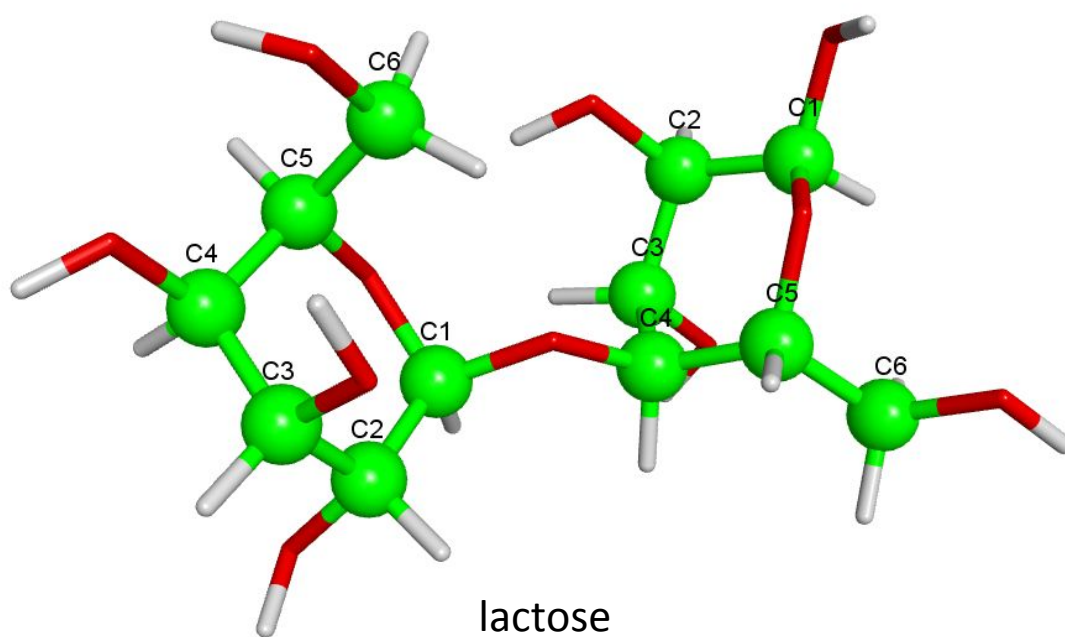

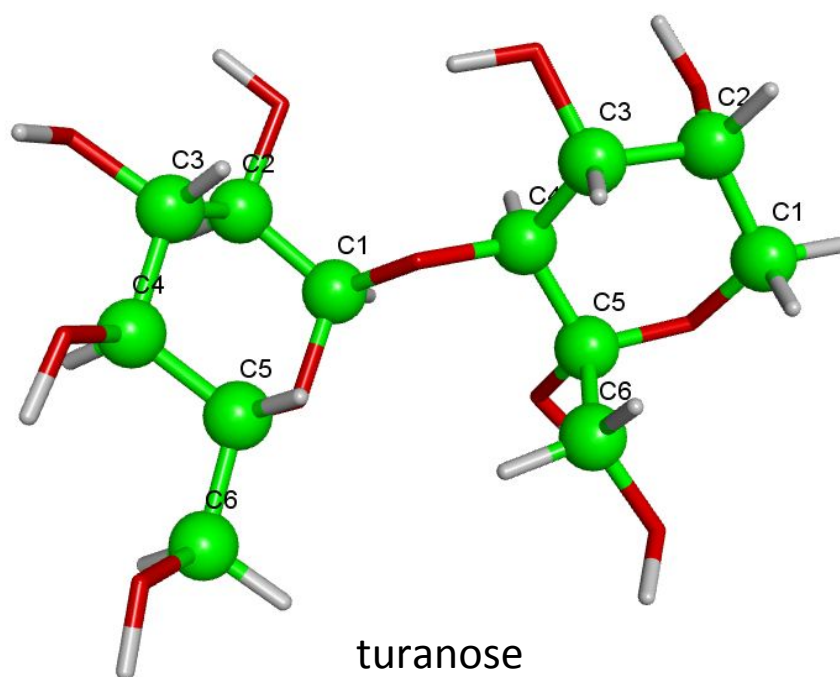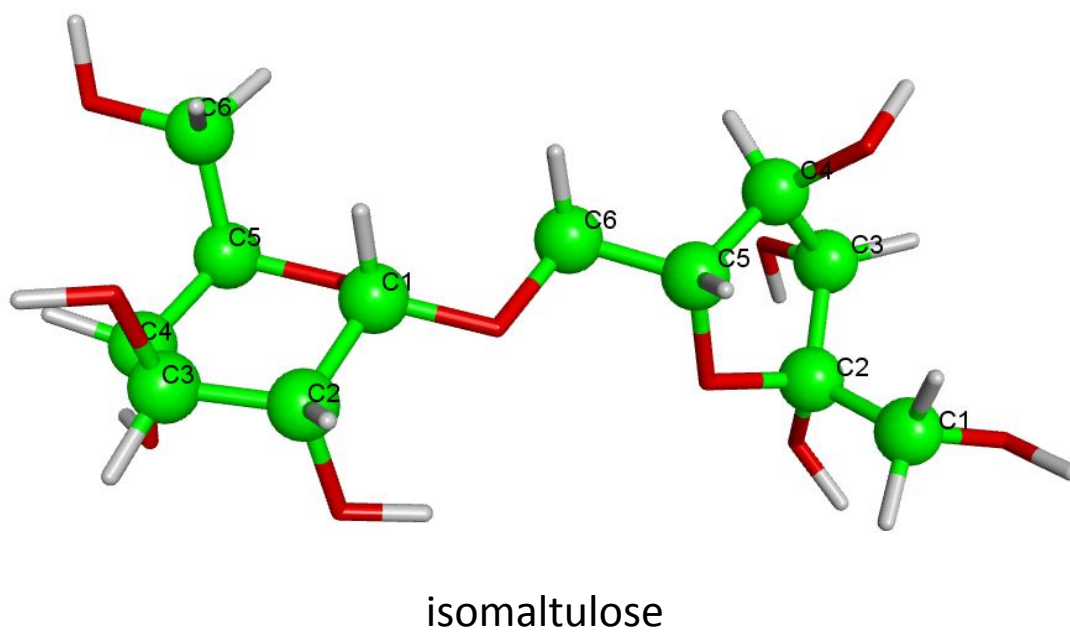

**Figure S2** Carbon atom analysis diagram of six disaccharides
